# Supplementary material for: Nickel(II) Complex of Polyhydroxybenzaldehyde N4-Thiosemicarbazone Exhibits Anti-Inflammatory Activity by Inhibiting NF-κB Transactivation
Source: PubMed Central journal article supplement (PMC4076215; doi:10.1371/journal.pone.0100933), 2014-06-30

## Supporting Information

**Figure S1.** Complex 5 inhibits TNF-induced COX2 expression. HeLa S3 cells pretreated with or without various concentrations of complex 5 as indicated for 4 h were stimulated with TNF $\alpha$  for 2 h. The expression of COX2 and TNF were measured by QPCR.

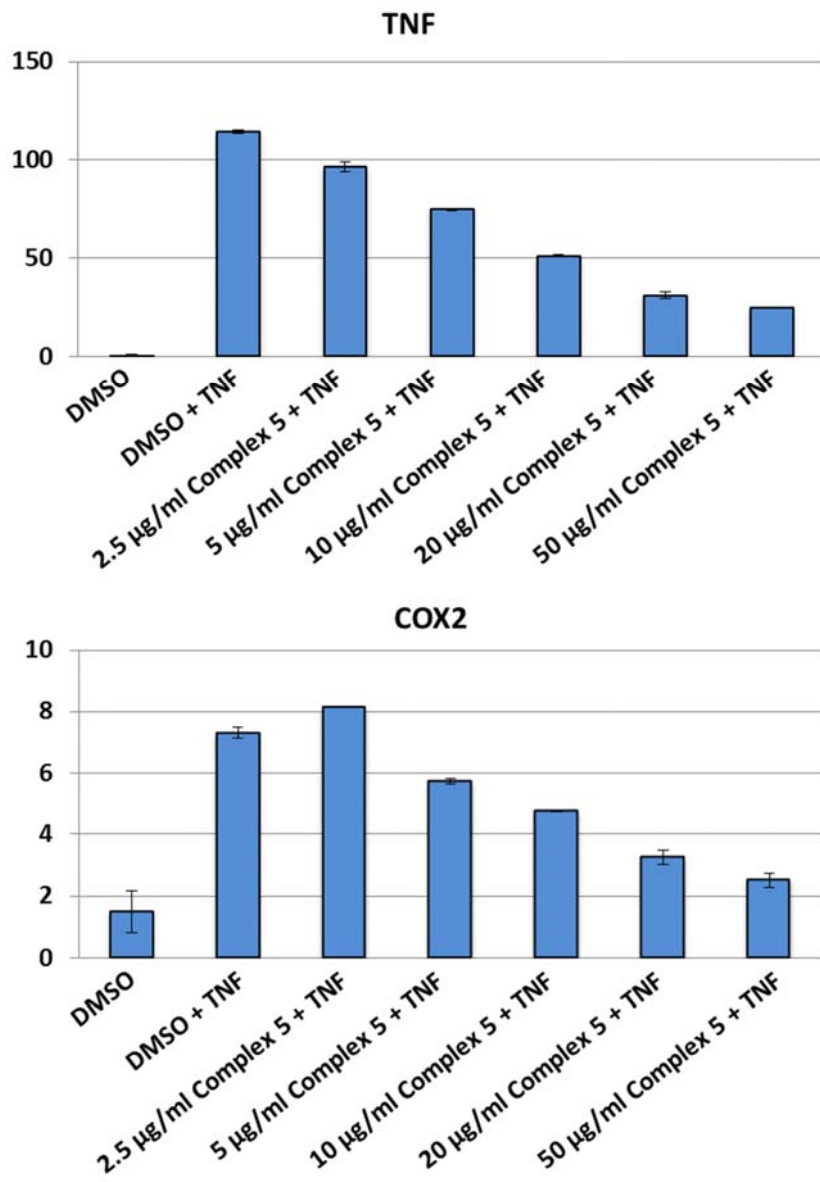

Supplement: pone.0100933.s001.pdf [file pone.0100933.s001.pdf]
