# Supplementary material for: Nickel(II) Complex of Polyhydroxybenzaldehyde N4-Thiosemicarbazone Exhibits Anti-Inflammatory Activity by Inhibiting NF-κB Transactivation
Source: PubMed Central journal article supplement (PMC4076215; doi:10.1371/journal.pone.0100933), 2014-06-30
Supplement: pone.0100933.s002.pdf [file pone.0100933.s002.pdf]

**Table S1**

Sequences of the primers used in quantitative PCR analysis.

| <b>Primers</b>   | <b>Sequences</b>         |
|------------------|--------------------------|
| hL32 5'          | AGCTCCCAAAAATAGACGCAC    |
| hL32 3'          | TTCATAGCAGTAGGCACAAAGG   |
| hTNF $\alpha$ 5' | CTATCTGGGAGGGGTCTTCC     |
| hTNF $\alpha$ 3' | ATGTTTCGTCTCCTCACAGG     |
| hIL-8 5'         | AGCTCTGTCTGGACCCCAAG     |
| hIL-8 3'         | GAATTCTCAGCCCTCTTCAAAAAC |
| hCCL5 5'         | CCCAGCAGTCGTCTTTGTCA     |
| hCCL5 3'         | TCCCGAACCATTCTTCTCT      |
| hICAM-1 5'       | TCTGTGTCCCCCTCAAAGTC     |
| hICAM-1 3'       | GGGGTCTCTATGCCCAACAA     |
| hA20 5'          | AAGCTGTGAAGATACGGGAGA    |
| hA20 3'          | CGATGAGGGCTTTGTGGATGAT   |
| hIL-6 5'         | AAATTCGGTACATCCTCGACGG   |
| hIL-6 3'         | GGAAGGTTTCAGGTTGTTTTCTGC |
| hCOX2 5'         | TGAGCATCTACGGTTTGCTG     |
| hCOX2 3'         | TGCTTGTCTGGAACAACCTGC    |
| mL32 5'          | AACCCAGAGGCATTGACAAC     |
| mL32 3'          | ATTGTGGACCAGGAACCTTGC    |
| mTNF $\alpha$ 5' | CTACTCCCAGGTTCTCTCAA     |
| mTNF $\alpha$ 3' | GCAGAGAGGAGGTTGACTTTC    |
| mIFN $\beta$ 5'  | CCCTATGGAGATGACGGAGA     |
| mIFN $\beta$ 3'  | CTGTCTGCTGGTGGAGTTCA     |
| mIL-6 5'         | CCGGAGAGGAGACTTCACAG     |
| mIL-6 3'         | TCCACGATTTCCCAGAGAAC     |
| mIP-10 5'        | AGGACGGTCCGCTGCAA        |
| mIP-10 3'        | CATTCTCACTGGCCCGTCAT     |
