# Supplementary material for: Nickel(II) Complex of Polyhydroxybenzaldehyde N4-Thiosemicarbazone Exhibits Anti-Inflammatory Activity by Inhibiting NF-κB Transactivation
Source: PubMed Central journal article supplement (PMC4076215; doi:10.1371/journal.pone.0100933), 2014-06-30
Supplement: pone.0100933.s003.pdf [file pone.0100933.s003.pdf]

**Table S2**

Renal functional test. C57BL/6 mice at age 8-12 weeks old were administrated orally with control PBS or with various concentrations (125 mg/kg, 250 mg/kg and 500 mg/kg) of complex 5. n= 6 (3 male and 3 female mice)/group. After two weeks, sera were collected from the mice for renal functional test. Note that there were no significant changes observed for sodium, potassium, chlorine, urea and creatinine levels in mice sera except a slight changes in the CO<sub>2</sub> and anion gap levels. Shown were mean  $\pm$  SD.

|              | <b>Sodium<br/>(mmol/L)</b> | <b>Potassium<br/>(mmol/L)</b> | <b>Chlorine<br/>(mmol/L)</b> | <b>CO<sub>2</sub><br/>(mmol/L)</b> | <b>Anion<br/>Gap<br/>(mmol/L)</b> | <b>Urea<br/>(mmol/L)</b> | <b>Creatinine<br/>(<math>\mu</math>mol/L)</b> |
|--------------|----------------------------|-------------------------------|------------------------------|------------------------------------|-----------------------------------|--------------------------|-----------------------------------------------|
| Control      | 153.25 $\pm$<br>0.95       | 5.75 $\pm$ 0.55               | 114.75 $\pm$<br>1.50         | 10.85 $\pm$<br>2.78                | 33.75 $\pm$<br>1.89               | 9.95 $\pm$<br>1.03       | <9                                            |
| 125<br>mg/kg | 147.00 $\pm$<br>1.22       | 6.68 $\pm$ 1.12               | 110.80 $\pm$<br>1.30         | 18.18 $\pm$<br>1.37                | 24.80 $\pm$<br>0.83               | 10.72 $\pm$<br>1.14      | <9                                            |
| 250<br>mg/kg | 147.50 $\pm$<br>1.04       | 6.50 $\pm$ 0.52               | 111.00 $\pm$<br>1.78         | 16.36 $\pm$<br>2.54                | 26.67 $\pm$<br>2.25               | 9.96 $\pm$<br>1.15       | <9                                            |
| 500<br>mg/kg | 148.33 $\pm$<br>1.86       | 5.83 $\pm$ 0.74               | 110.83 $\pm$<br>1.60         | 16.14 $\pm$<br>2.08                | 27.00 $\pm$<br>1.41               | 9.56 $\pm$<br>1.44       | <9                                            |
