# Supplementary material for: Nickel(II) Complex of Polyhydroxybenzaldehyde N4-Thiosemicarbazone Exhibits Anti-Inflammatory Activity by Inhibiting NF-κB Transactivation
Source: PubMed Central journal article supplement (PMC4076215; doi:10.1371/journal.pone.0100933), 2014-06-30
Supplement: pone.0100933.s004.pdf [file pone.0100933.s004.pdf]

**Table S3**

Liver functional test. C57BL/6 mice at age 8-12 weeks old were administrated orally with control PBS or with various concentrations (125 mg/kg, 250 mg/kg and 500 mg/kg) of complex **5**. n= 6 (3 male and 3 female mice)/group. After two weeks, sera were collected from the mice for liver functional test. Note that for most of tests performed (total protein, albumin, total and conjugated bilirulin, and G-glutamyl transferase) showed no marked changes between control mice and of complex **5**-treated mice. However, some parameters, such as ALP level were elevated from  $163.00 \pm 7.18$  IU/L in the control mice to  $219.50 \pm 4.95$  IU/L in mice treated with a high dose of complex **5** at 500 mg/kg. On the contrary, a marked reduction of AST level from control  $453.00 \pm 76.29$  to  $316.50 \pm 78.49$  were observed in mice treated with high dose of Complex **5** at 500 mg/kg. Shown were mean  $\pm$  SD. TBIL: Total Bilirubin, BC: Conjugated Bilirubin, ALP: Alkaline Phophatase, ALT: Alanine Aminotransferase, AST: Aspartate Transaminase, GGT: G-Glutamyl Transferase.

|           | <b>Total Protein (g/L)</b> | <b>Albumin (g/L)</b> | <b>Globulin (g/L)</b> | <b>TBIL (umol/L)</b> | <b>BC (umol/L)</b> | <b>ALP (IU/L)</b> | <b>ALT (IU/L)</b> | <b>AST (IU/L)</b>  | <b>GGT (IU/L)</b> |
|-----------|----------------------------|----------------------|-----------------------|----------------------|--------------------|-------------------|-------------------|--------------------|-------------------|
| Control   | 59.00 $\pm$ 0.97           | 17.00 $\pm$ .070     | 42.00 $\pm$ 0.37      | 3.00 $\pm$ 0.00      | <1                 | 163.00 $\pm$ 7.18 | 91.00 $\pm$ 3.06  | 453.00 $\pm$ 76.29 | <3                |
| 125 mg/kg | 60.00 $\pm$ 2.12           | 18.00 $\pm$ 0.57     | 42.00 $\pm$ 1.06      | 3.00 $\pm$ 0.45      | <1                 | 192.00 $\pm$ 3.52 | 69.00 $\pm$ 7.11  | 421.00 $\pm$ 40.81 | <3                |
| 250 mg/kg | 59.00 $\pm$ 1.08           | 17.00 $\pm$ 1.41     | 42.00 $\pm$ 0.00      | 2.50 $\pm$ 0.70      | <1                 | 195.00 $\pm$ 5.66 | 70.00 $\pm$ 4.10  | 414.00 $\pm$ 79.20 | <3                |
| 500 mg/kg | 53.50 $\pm$ 0.70           | 16.00 $\pm$ 1.41     | 37.50 $\pm$ 2.12      | 3.00 $\pm$ 0.00      | <1                 | 219.50 $\pm$ 4.95 | 70.00 $\pm$ 8.49  | 316.50 $\pm$ 78.49 | <3                |
